# Supplementary material for: Surficial sediment texture database for SW Iberia Atlantic Margin
Source: Copernicus journal article supplement (doi:10.5194/essd-2018-30), 2018-04-03
Supplement: Supplementary file [file essd-2018-30-AC1-supplement.pdf]

# Reply RC1 queries

RC1: The authors only present mean grain size information (obtained either by Folk & Ward or Moments methods). Are these values, obtained by different techniques, merged in the maps? Maybe this information could be available in the figure captions.

Authors: We understand the problem raised by Reviewer 1 as the presented figures show the mean grain size of the sediments collected within different projects, and indeed in one case (i.e. Figure 7) it shows the results after Folk and Ward and the moments method.

Changes: We will add a reference to the methods used to calculate the textural parameters of the samples displayed within each figure, and for the particular case of Figure 7, we will specify which have been estimated by applying the moments and Folk and Ward method.

RC1: I would like to read about the grain size distributions, with information about modality and dispersion of the grain size around the mean (such as standard deviation values).

Authors: The query raised by the reviewer is pertinent as in many cases the information about the mean grain size cannot help to understand how well sorted or not are the sediments, which in turn might have important implications from the hydrodynamic or sediment source points of view, for example.

Changes: In order to meet this query, we will include the description of the distribution of grain size over the populations described within the text, and we will also add a new panel to figures 3, 4, 5, and 7 that will represent the sediment sorting, as indicator of the grain size distribution of the sediments.
